# Supplementary material for: Combined effects of ion-pairing on multi-emissive properties of benzimidazolium salts
Source: Royal Society of Chemistry journal article supplement (doi:10.1039/d1tc00503k), 2021-01-01
Supplement: d1tc00503k1.pdf [file d1tc00503k1.pdf]

# Combined Effects of Ion-Pairing on Multi-Emissive Properties of Benzimidazolium Salts

Gabriele Di Carlo,<sup>\*[a]</sup> Alessandra Forni,<sup>\*[b]</sup> Paola Moretti,<sup>[a]</sup> Daniele Marinotto,<sup>[b]</sup> Chiara Botta,<sup>[c]</sup> Maddalena Pizzotti,<sup>[a]</sup> Francesca Tessore<sup>[a]</sup> and Elena Cariati<sup>[a]</sup>

---

[a] Prof. E. Cariati, Prof. F. Tessore, Prof. M. Pizzotti, Dr. G. Di Carlo and Mrs. P. Moretti

Department of Chemistry  
University of Milan and INSTM Research Unit  
Via C. Golgi 19, 20133 Milan (Italy)  
E-mail: [gabriele.dicarlo@unimi.it](mailto:gabriele.dicarlo@unimi.it)

[b] Dr. A. Forni and Dr. D. Marinotto  
CNR-SCITEC, Istituto di Scienze e Tecnologie Chimiche "G. Natta"  
Via C. Golgi 19, 20133 Milan (Italy)  
E-mail: [alessandra.forni@scitec.cnr.it](mailto:alessandra.forni@scitec.cnr.it)

[c] Dr. Chiara Botta  
CNR-SCITEC, Istituto di Scienze e Tecnologie Chimiche "G. Natta"  
Via A. Corti 12, 20133 MILANO (Italy)

## Table of Contents

|     |                                                    |    |
|-----|----------------------------------------------------|----|
| 1   | Experimental details.....                          | 1  |
| 1.1 | General information.....                           | 1  |
| 1.2 | Synthesis.....                                     | 1  |
| 1.3 | Single crystal X-ray crystallographic studies..... | 1  |
| 1.4 | Computational details.....                         | 2  |
| 1.5 | Photophysical characterization.....                | 2  |
| 2   | NMR studies.....                                   | 3  |
| 3   | Photophysical Studies.....                         | 6  |
| 3.1 | Solutions.....                                     | 6  |
| 3.2 | Solids.....                                        | 8  |
| 4   | Crystal structures.....                            | 11 |
| 5   | Theoretical studies.....                           | 13 |
| 6   | References.....                                    | 20 |

# 1 Experimental details

## 1.1 General information

All reagents and solvents involved in the synthesis were purchased from Sigma Aldrich and used as received, except THF (freshly distilled from Na/benzophenone under nitrogen atmosphere). Glassware has been flame-dried under vacuum before use when necessary.  $^1\text{H}$ -NMR spectra were recorded on a Bruker Avance DRX-400 in  $\text{DMSO-}d_6$ ,  $\text{CDCl}_3$  and  $\text{CD}_3\text{OD}$  as solvents at  $10^{-3}\text{M}$  ( $10^{-5}\text{M}$  where shown). Elemental analysis was carried out with a Perkin-Elmer CHN 2400 instrument.

## 1.2 Synthesis

Triflate (**1-OTf**), nitrate (**1-NO<sub>3</sub>**) and iodide (**1-I**) salts of 1,3-dimethyl-2-(4-methylphenyl)-1H-benzimidazolium (**1**) are easily obtained by following the synthetic strategy previously reported by some of us.[S1] The high purity grade of the final products, required for photophysical measurements, are obtained by Biotage flash chromatography and multiple recrystallizations with proper solvents.

**1-OTf crystals** were obtained by repeated crystallization steps from ethanol at +4°C. Elemental analysis calcd (%) for  $\text{C}_{17}\text{H}_{17}\text{F}_3\text{N}_2\text{O}_3\text{S}$ : C 52.84, H 4.43, N 7.25; found C 52.71, H 4.43, N 7.24. MS-ESI (+) m/z: calcd (%) for  $\text{C}_{16}\text{H}_{17}\text{N}_2^+$  237, found 237  $[\text{M}]^+$ . MS-ESI (-) m/z: calcd (%) for  $\text{CF}_3\text{O}_3\text{S}^-$  149, found 149  $[\text{M}]^-$ .

**1-NO<sub>3</sub>·0.5EtOH crystals** were obtained by repeated crystallization steps from ethanol at +4°C. Elemental analysis calcd (%) for  $\text{C}_{16}\text{H}_{17}\text{N}_3\text{O}_3$ : C 63.34, H 6.25, N 13.04; found C 63.18, H 6.23, N 13.08. MS-ESI (+) m/z: calcd (%) for  $\text{C}_{16}\text{H}_{17}\text{N}_2^+$  237, found 237  $[\text{M}]^+$ . MS-ESI (-) m/z: calcd (%) for  $\text{NO}_3^-$  62, found 62  $[\text{M}]^-$ .

**1-NO<sub>3</sub>·H<sub>2</sub>O crystals** were obtained by repeated crystallization steps from acetonitrile/water (9:1) solution at +4°C. Elemental analysis calcd (%) for  $\text{C}_{16}\text{H}_{19}\text{N}_3\text{O}_4\cdot[0.5\text{C}_2\text{H}_6\text{O}]$ : C 60.56, H 6.03, N 13.24; found C 60.47, H 6.01, N 13.21. MS-ESI (+) m/z: calcd (%) for  $\text{C}_{16}\text{H}_{17}\text{N}_2^+$  237, found 237  $[\text{M}]^+$ . MS-ESI (-) m/z: calcd (%) for  $\text{NO}_3^-$  62, found 62  $[\text{M}]^-$ .

**1-I·0.5CH<sub>2</sub>Cl<sub>2</sub> crystals** were obtained by repeated crystallization steps from dichloromethane at +4°C. Elemental analysis calcd (%) for  $\text{C}_{16}\text{H}_{17}\text{IN}_2\cdot[0.5\text{CH}_2\text{Cl}_2]$ : C 48.73, H 4.46, N 6.89; found C 48.87, H 4.46, N 6.90. MS-ESI (+) m/z: calcd (%) for  $\text{C}_{16}\text{H}_{17}\text{N}_2^+$  237, found 237  $[\text{M}]^+$ . MS-ESI (-) m/z: calcd (%) for  $\text{I}^-$  127, found 127  $[\text{M}]^-$ .

## 1.3 Single crystal X-ray crystallographic studies

X-ray data of **1-OTf**, **1-NO<sub>3</sub>·0.5EtOH**, **1-NO<sub>3</sub>·H<sub>2</sub>O** and **1-I·0.5CH<sub>2</sub>Cl<sub>2</sub>** were collected on a Bruker Apex II diffractometer using  $\text{MoK}\alpha$  radiation. The structures were solved using direct methods and refined using a full-matrix least squares procedure based on  $F^2$  using all data [S2]. Hydrogen atoms were

placed at geometrically estimated positions. Details relating to the crystals and the structural refinements are presented in Table S2. Full details of crystal data and structure refinement, in CIF format, are available as Supplementary Information.

CCDC reference numbers: 2018732 (**1-OTf**), 2018733 (**1-NO<sub>3</sub>·0.5EtOH**), 2018734 (**1-NO<sub>3</sub>·H<sub>2</sub>O**) and 2018735 (**1-I·0.5CH<sub>2</sub>Cl<sub>2</sub>**).

#### 1.4 Computational details

DFT and TDDFT calculations have been performed in vacuo at the  $\omega$ B97X/6-311++G(d,p) level of theory on both the 1,3-dimethyl-2-(4-methylphenyl)-1H-benzimidazolium cation **1** and its salts with OTf<sup>-</sup>, NO<sub>3</sub><sup>-</sup> and I<sup>-</sup> anions. The  $\omega$ B97X [S3] functional was used owing to its ability in correctly treating at the same time not only ground and excited states properties, but also intermolecular interactions. In the case of the free cation, geometry was fully optimized starting from the X-ray one of **1-OTf**. As for the salts, the cation-anion pairs displaying the shortest intermolecular contacts in the corresponding X-ray structures have been extracted from the crystal and submitted to geometry optimization by constraining angles and torsions to the experimental values.

All calculations have been performed with the Gaussian 16 program (Revision A.03) [S4].

#### 1.5 Photophysical characterization

Luminescence measurements. Steady state emission and excitation spectra and photoluminescence lifetimes were obtained using a FLS 980 spectrofluorimeter (Edinburgh Instrument Ltd). The steady state measurements were obtained by a 450 W Xenon arc lamp. Photoluminescence lifetime measurements were performed using: Edinburgh EPLED-300, (Edinburgh Instrument Ltd) and microsecond flash Xe-lamp (60W, 0.1÷100 Hz) with data acquisition devices time correlated single-photon counting (TCSPC) and multi-channel scaling (MCS) methods, respectively.

Photoluminescence quantum yields were measured using a C11347 Quantaaurus – Absolute Photoluminescence Quantum Yield Spectrometer (Hamamatsu Photonics K.K), equipped with a 150 W Xenon lamp, an integrating sphere and a multichannel detector.

## 2 NMR studies

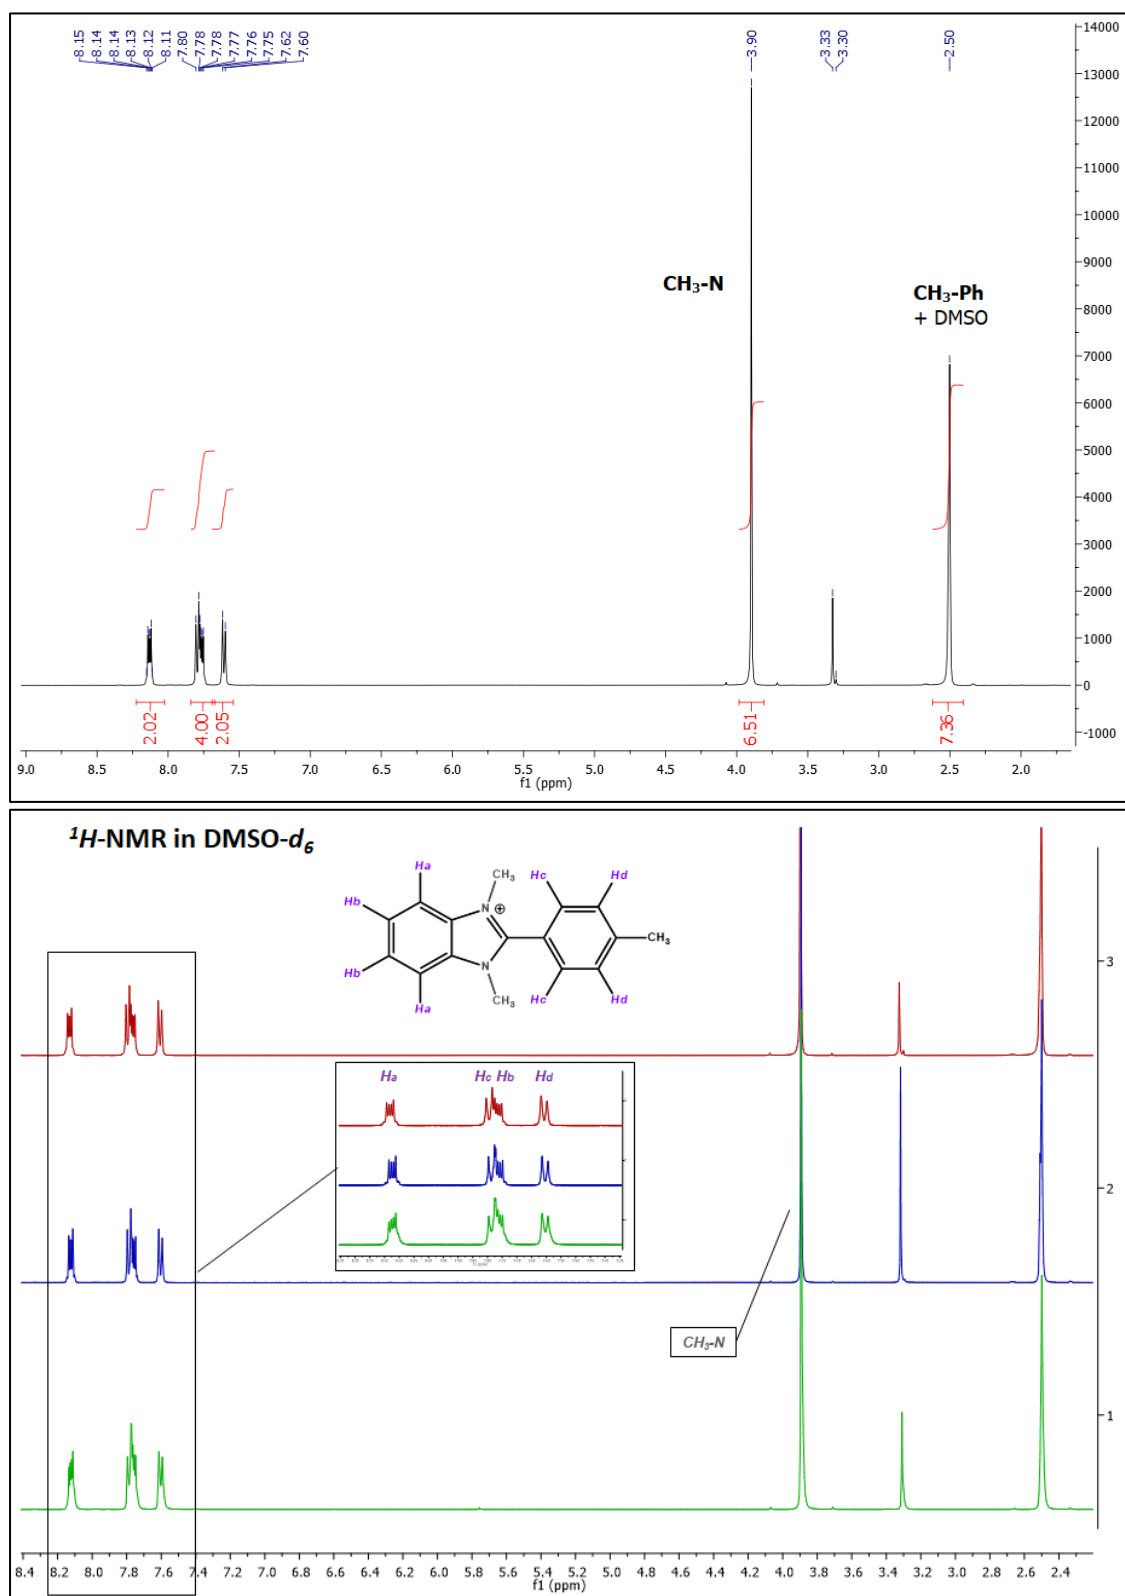

**Figure S1:** Integrated  $^1\text{H-NMR}$  spectrum (up) of **1-I** (at 298K) in  $\text{DMSO-}d_6$ . Stacked  $^1\text{H-NMR}$  spectra (down) of **1-I** (red); **1-NO<sub>3</sub>** (blue); **1-OTf** (green).

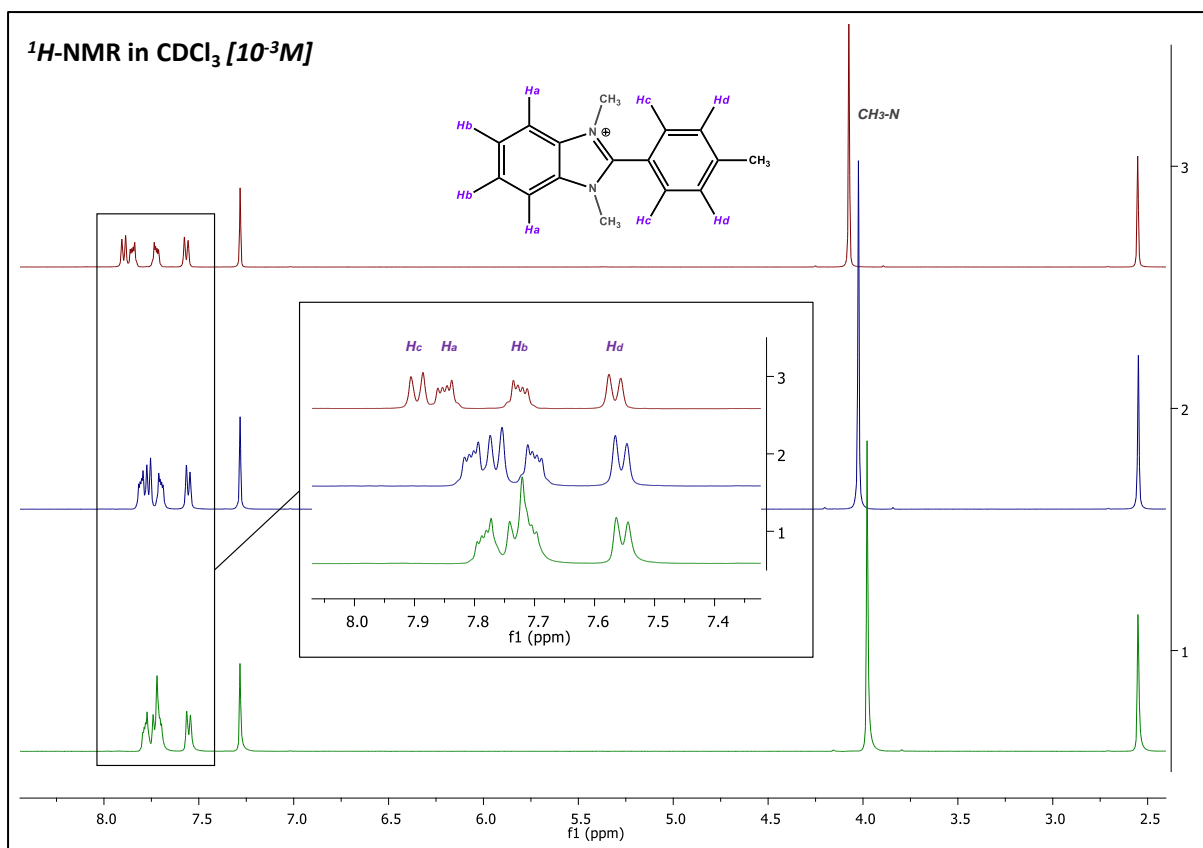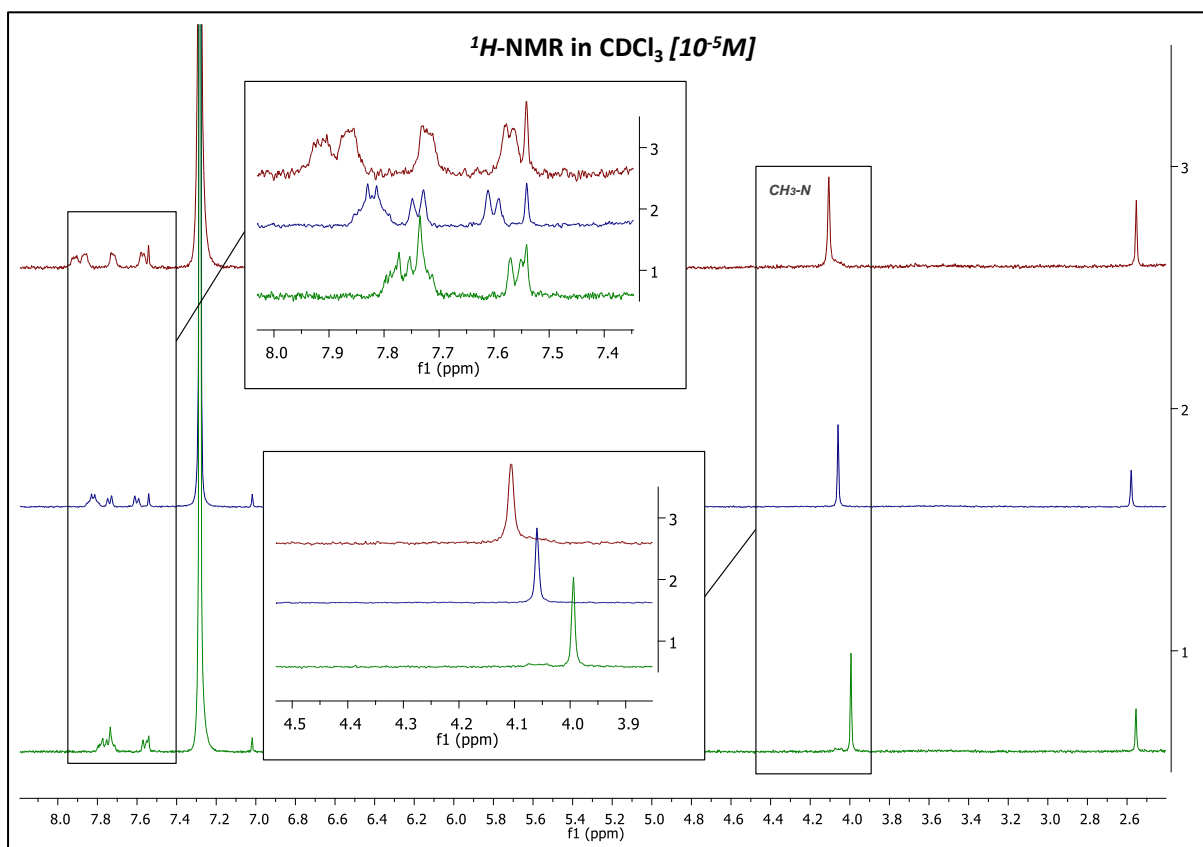

**Figure S2.** Stacked  $^1\text{H-NMR}$  spectra (at 298K) in  $\text{CDCl}_3$  of **1-I** (red); **1-NO<sub>3</sub>** (blue); **1-OTf** (green):  $10^{-3}\text{M}$  up;  $10^{-5}\text{M}$  down.

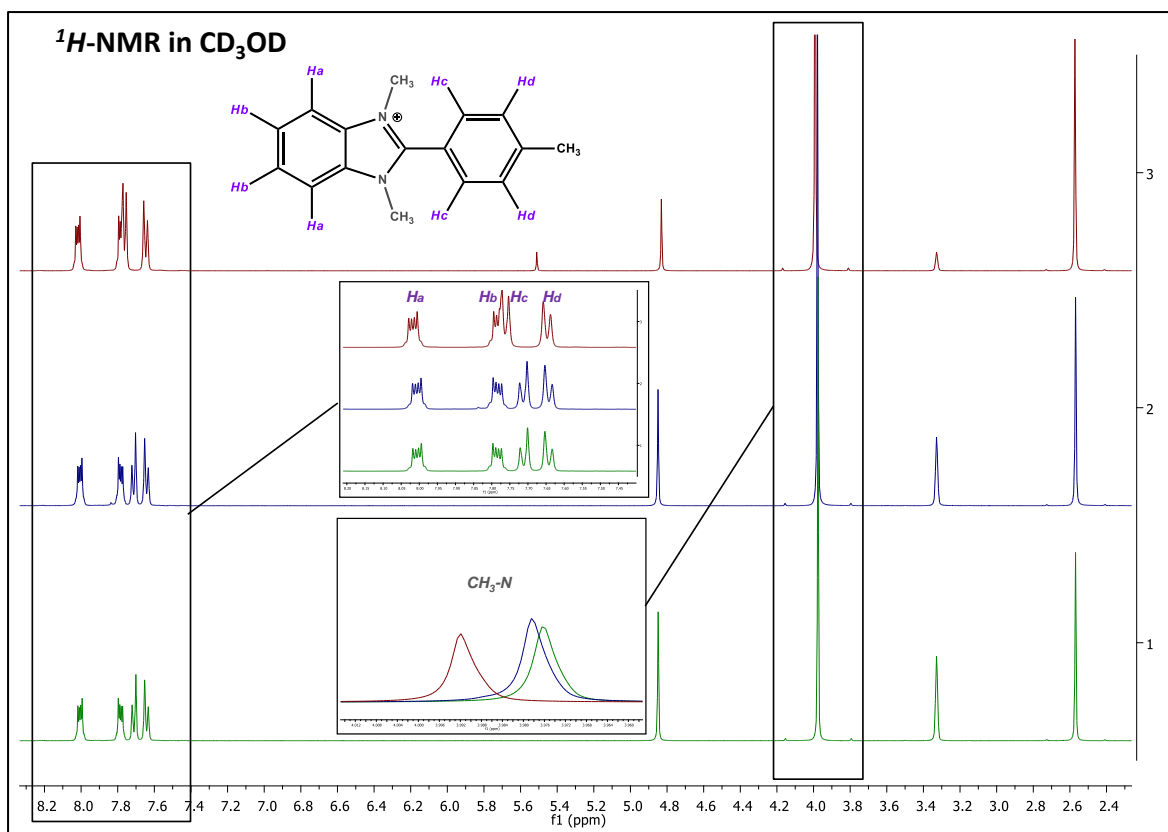

**Figure S3.** Stacked <sup>1</sup>H-NMR spectra (at 298K) in CD<sub>3</sub>OD of **1-I** (red); **1-NO<sub>3</sub>** (blue); **1-OTf** (green).

### 3 Photophysical Studies

#### 3.1 Solutions

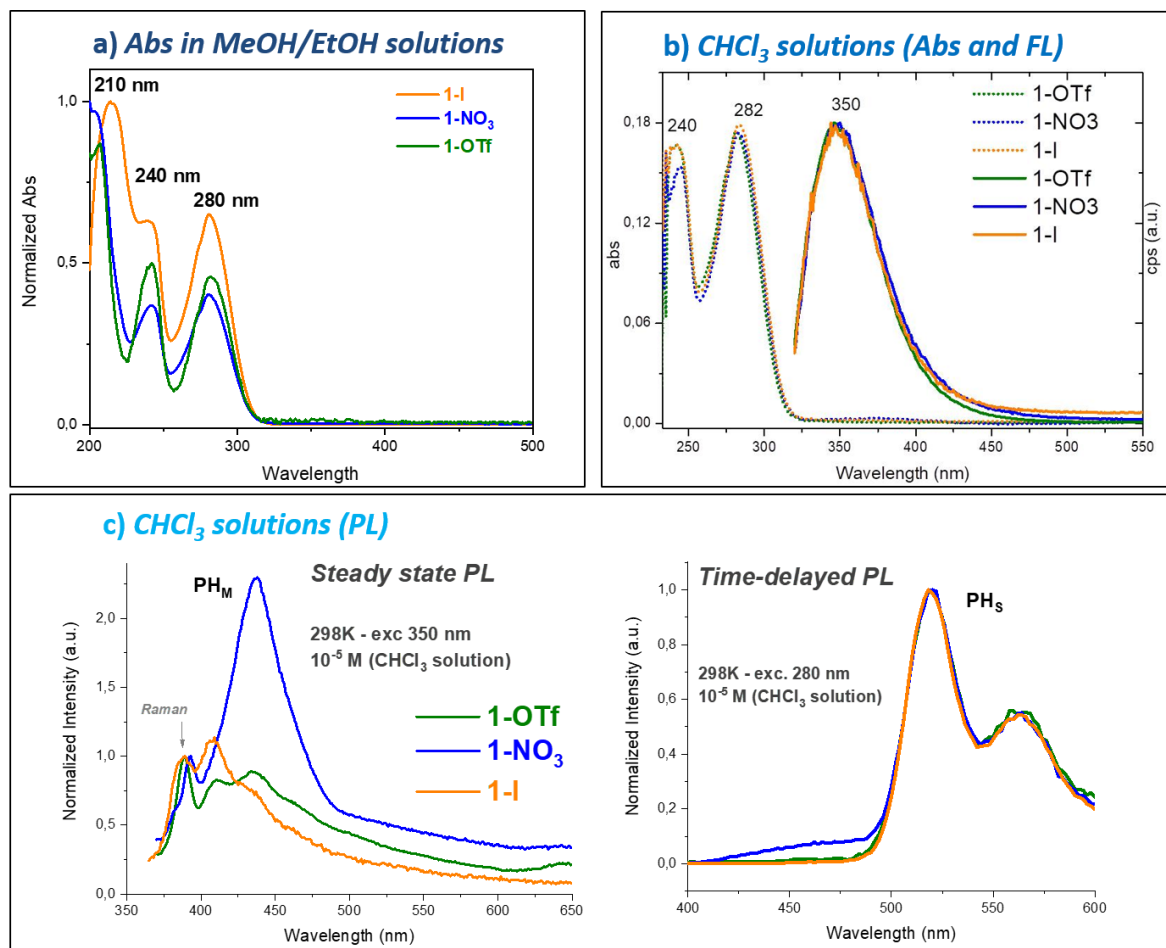

**Figure S4.** a) Absorption spectrum of diluted solutions ( $10^{-5}$  M) of **1**-salts in MeOH/EtOH. b) Absorption (solid line) and emission spectra (dotted line; exc 300 nm) at RT of diluted solutions ( $10^{-5}$  M) of **1**-salts in CHCl<sub>3</sub>. c) Steady-state and time-delayed PL emission spectra of **1**-salts in CHCl<sub>3</sub> (delay time 0.2 ms and window 1.5 ms for **1-OTf** and **1-I**; delay time 0.1 ms and window 0.5 ms for **1-NO<sub>3</sub>**).

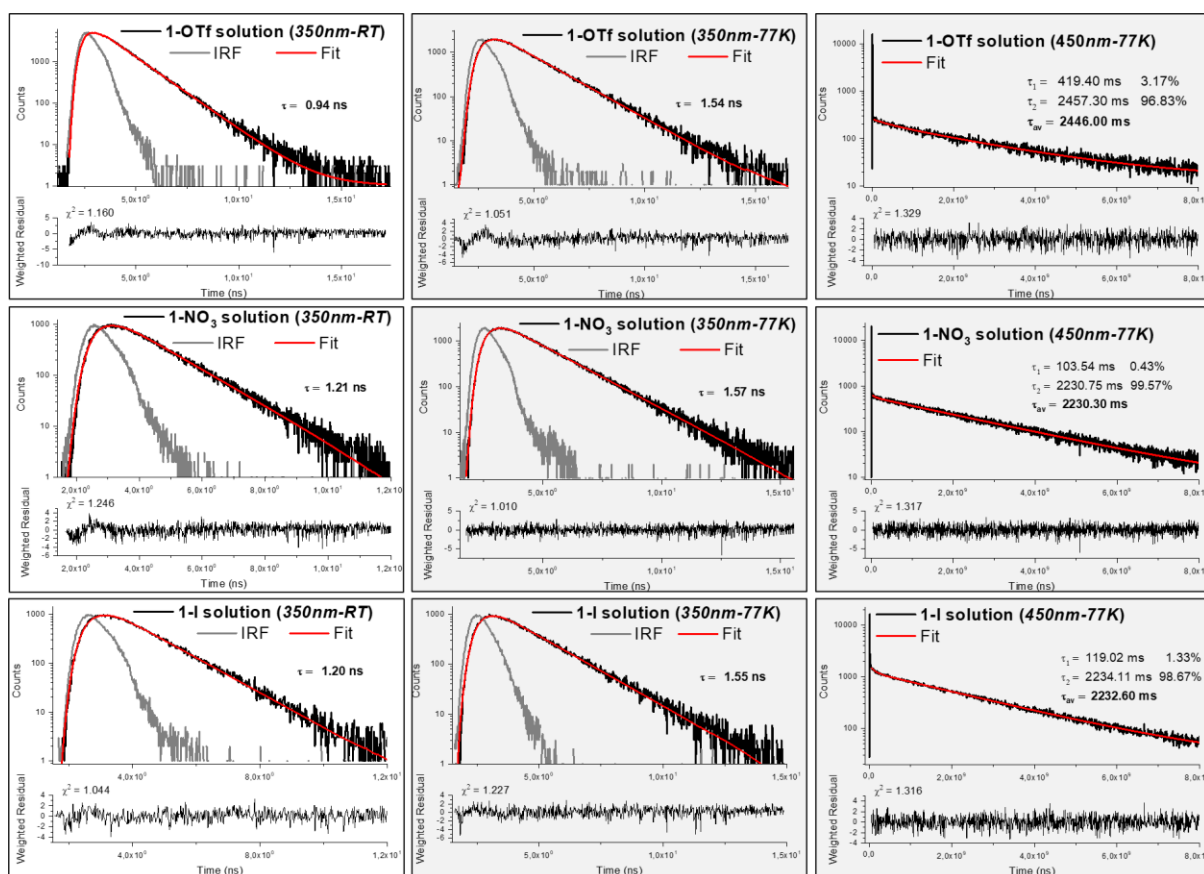

**Figure S5:** Emission decay profiles of 1-salts (excitation 300 nm) in MeOH/EtOH (1:4) diluted solution ( $10^{-5}$  M) at 298K and 77K.

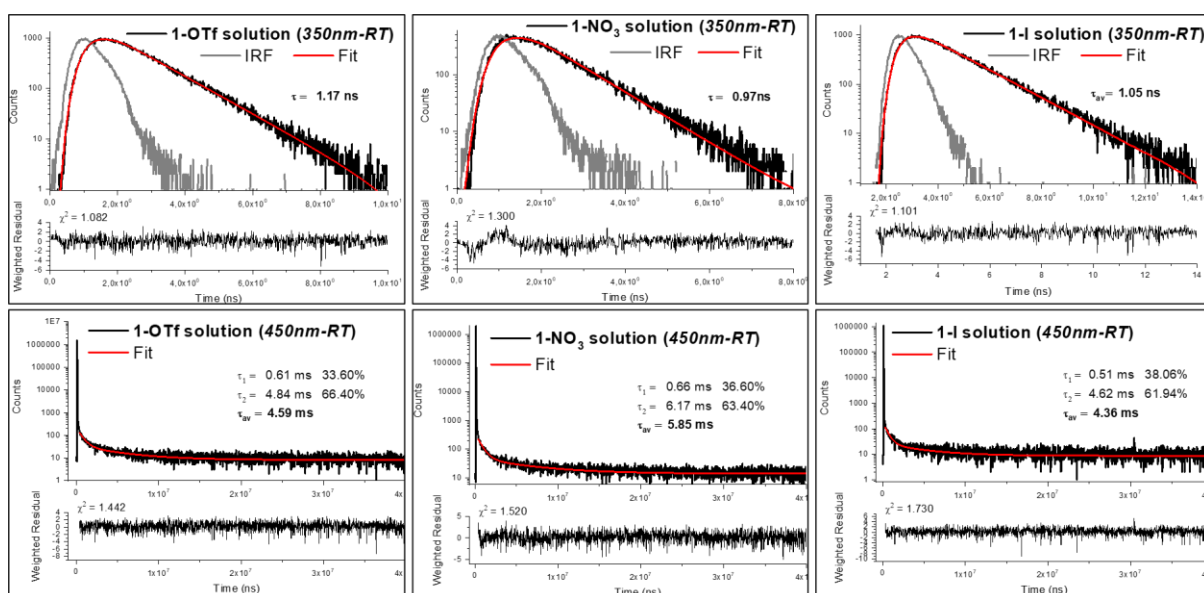

**Figure S6:** Emission decay profiles of 1-salts (excitation 300 nm) in non-polar solvent ( $10^{-5}$  M in CHCl<sub>3</sub>) at 298K.



## 3.2 Solids

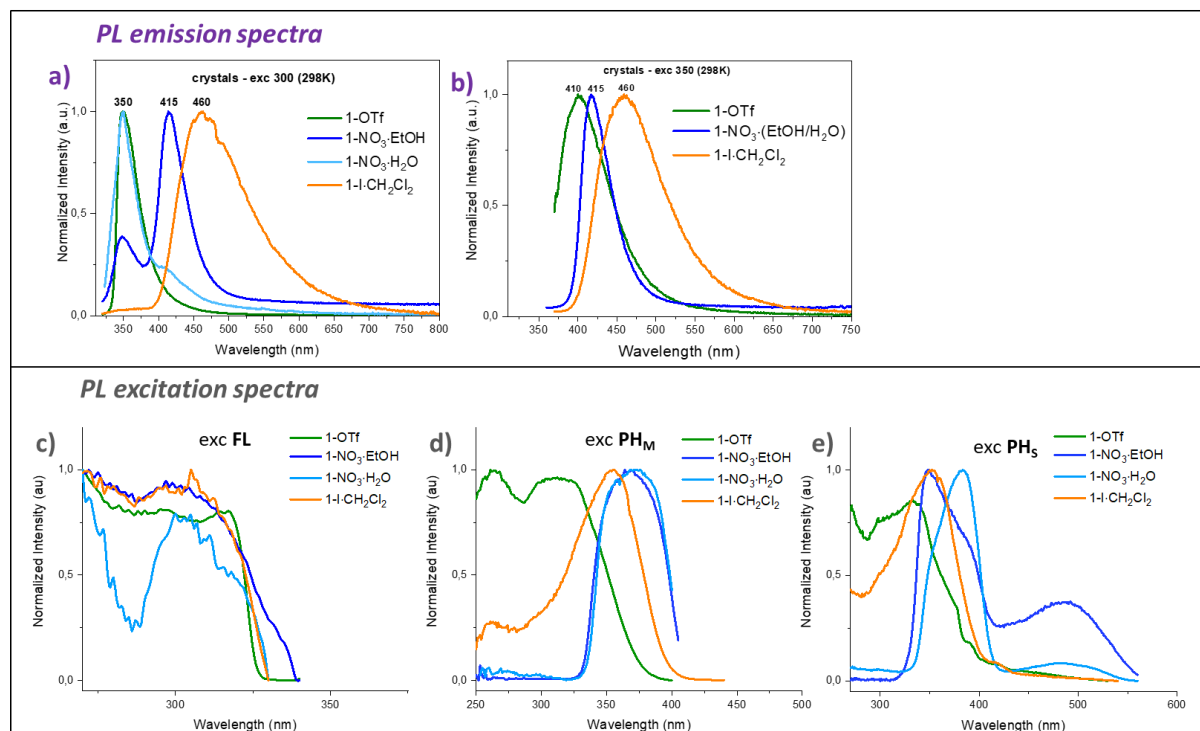

**Figure S7.** a) PL emission spectra of **1-OTf**, **1-NO<sub>3</sub>·EtOH**, **1-NO<sub>3</sub>·H<sub>2</sub>O** and **1-I·CH<sub>2</sub>Cl<sub>2</sub>** crystals at 298K (300 nm excitation). b) PL emission spectra at 298K under 350 nm excitation. c) Fluorescence excitation spectra. d) Molecular Phosphorescence excitation spectra. e) Supramolecular Phosphorescence excitation spectra.

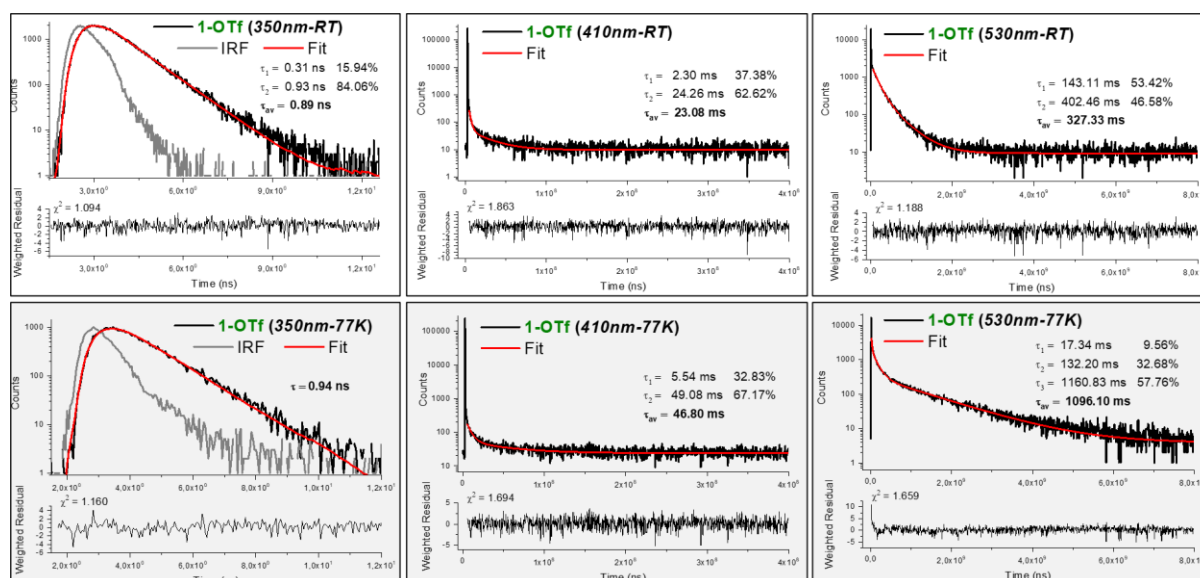

**Figure S8.** FL (350 nm), PH<sub>M</sub> (410 nm) and PH<sub>S</sub> (530 nm) decay profiles of **1-OTf** crystals (excitation 300 nm).

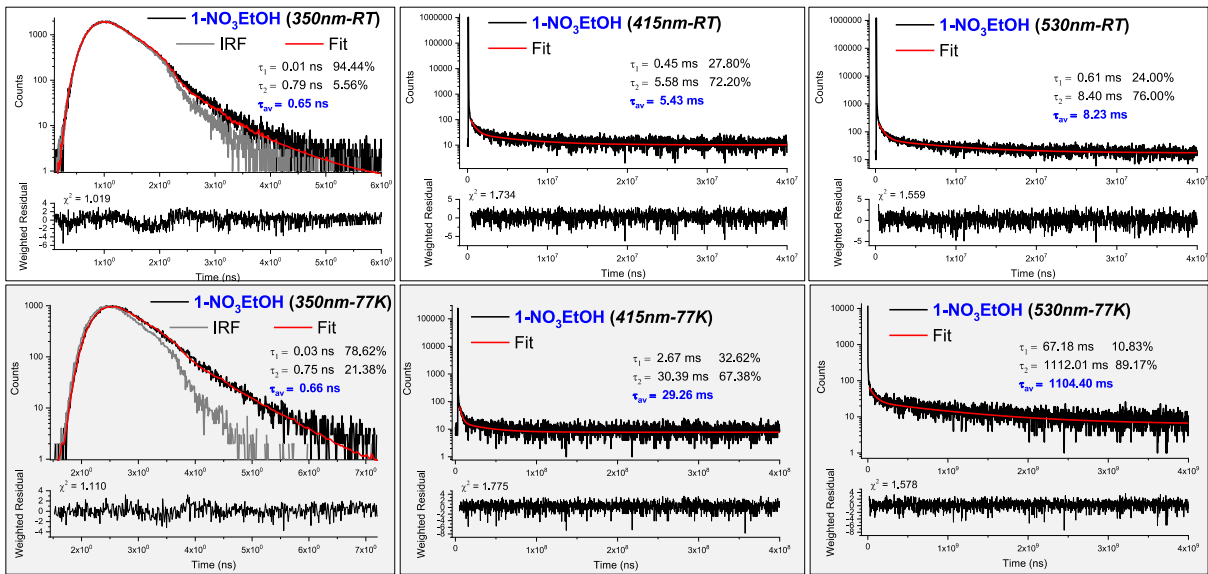

Figure S9. FL (350 nm),  $\text{PH}_M$  (415 nm) and  $\text{PH}_S$  (530 nm) decay profiles of  $1\text{-NO}_3\text{-EtOH}$  crystals (excitation 300 nm).

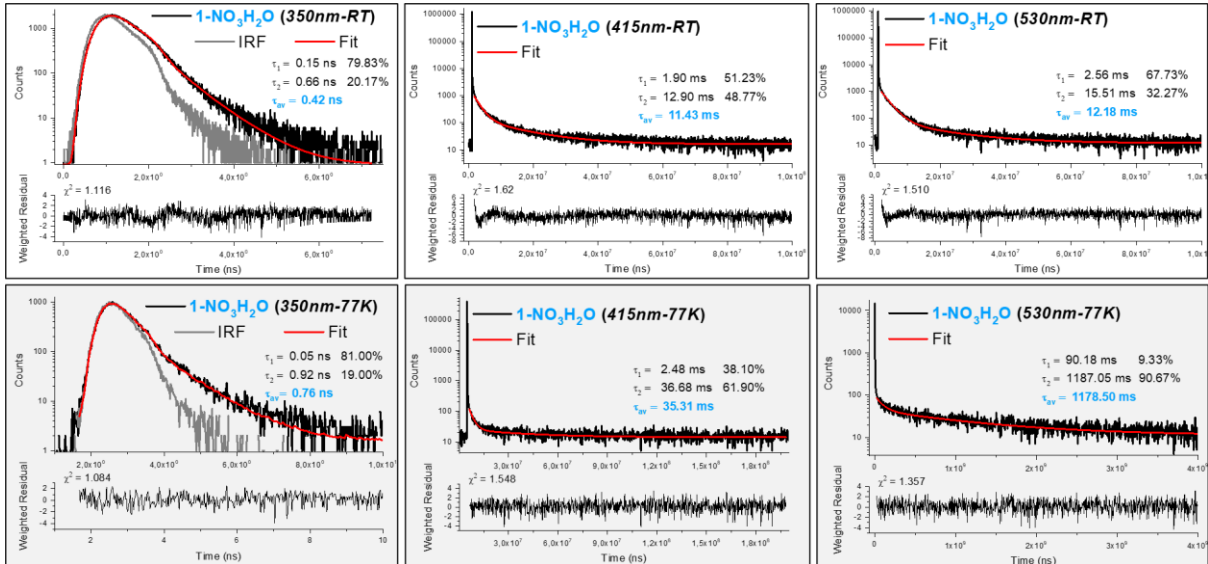

Figure S10. FL (350 nm),  $\text{PH}_M$  (415 nm) and  $\text{PH}_S$  (530 nm) decay profiles of  $1\text{-NO}_3\text{-H}_2\text{O}$  crystals (excitation 300 nm).

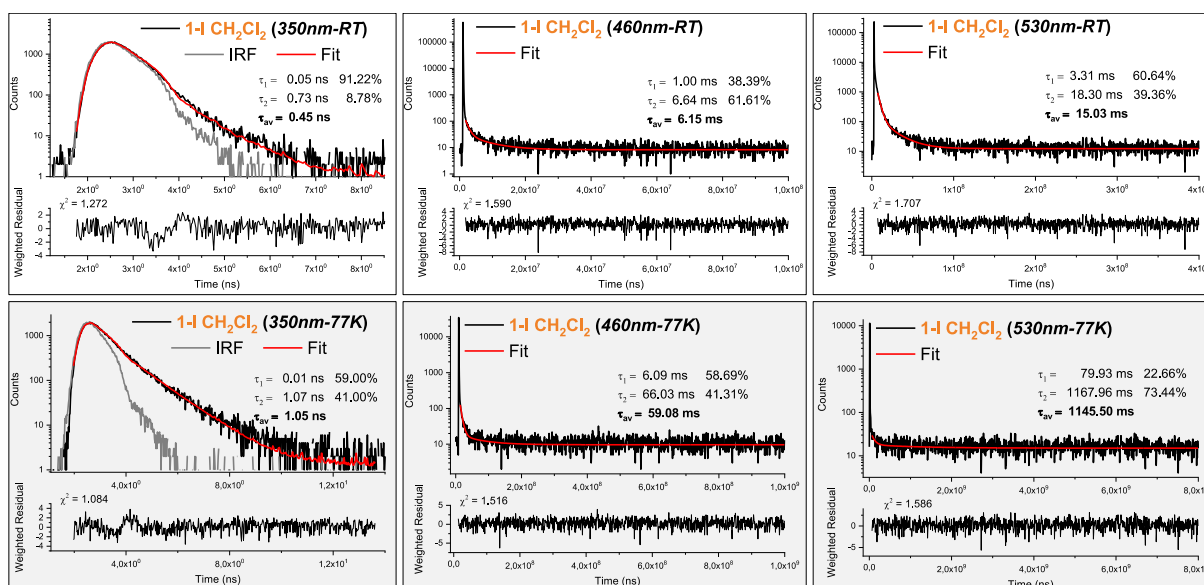

**Figure S11.** FL (350 nm), PH<sub>M</sub> (460 nm) and PH<sub>S</sub> (530 nm) decay profiles of **1-I·CH<sub>2</sub>Cl<sub>2</sub>** crystals (excitation 300 nm).

**Table S1.** Radiative ( $K_r$ ) and non-radiative ( $K_{nr}$ ) constants of **1**-salts.

|                                                    |                           | $\phi$                    | $\tau$ (ns) | $K_r$ (s <sup>-1</sup> ) <sup>a</sup> | $K_{nr}$ (s <sup>-1</sup> ) <sup>b</sup> | $K_r/K_{nr}$    |
|----------------------------------------------------|---------------------------|---------------------------|-------------|---------------------------------------|------------------------------------------|-----------------|
| <b>1-Otf</b><br>MeOH/EtOH                          | <i>Em</i> 350<br>(exc300) | 0,775                     | 0,94        | <b>8,24E+08</b>                       | <b>2,39E+08</b>                          | <b>3,45</b>     |
|                                                    | <b>1-Otf</b><br>crystal   | <i>Em</i> 350<br>(exc300) | 0,507       | 0,89                                  | <b>5,69E+08</b>                          | <b>5,54E+08</b> |
|                                                    | <i>Em</i> 410<br>(exc350) | 0,347                     | 2,3E+07     | <b>15,0870</b>                        | <b>28,3913</b>                           | <b>0,53</b>     |
| <b>1-NO<sub>3</sub></b><br>MeOH/EtOH               | <i>Em</i> 350<br>(exc300) | 0,526                     | 1,21        | <b>4,35E+08</b>                       | <b>3,92E+08</b>                          | <b>1,11</b>     |
| <b>1-NO<sub>3</sub>·EtOH</b><br>crystal            | <i>Em</i> 350<br>(exc300) | 0,037                     | 0,65        | <b>5,69E+07</b>                       | <b>1,48E+09</b>                          | <b>0,04</b>     |
|                                                    | <i>Em</i> 410<br>(exc350) | 0,73                      | 5,4E+06     | <b>135,1852</b>                       | <b>50,0000</b>                           | <b>2,70</b>     |
| <b>1-NO<sub>3</sub>·H<sub>2</sub>O</b><br>crystal  | <i>Em</i> 350<br>(exc300) | 0,019                     | 0,42        | <b>4,52+07</b>                        | <b>2,34E+09</b>                          | <b>0,02</b>     |
|                                                    | <i>Em</i> 410<br>(exc350) | 0,25                      | 1,14E+07    | <b>21,8532</b>                        | <b>65,5594</b>                           | <b>0,33</b>     |
| <b>1-I</b><br>MeOH/EtOH                            | <i>Em</i> 350<br>(exc300) | 0,536                     | 1,20        | <b>4,47E+08</b>                       | <b>3,87E+08</b>                          | <b>1,16</b>     |
| <b>1-I·CH<sub>2</sub>Cl<sub>2</sub></b><br>crystal | <i>Em</i> 350<br>(exc300) | 0,114                     | 0,45        | <b>2,53E+08</b>                       | <b>1,97E+09</b>                          | <b>0,13</b>     |
|                                                    | <i>Em</i> 410<br>(exc350) | 0,237                     | 6,15E+06    | <b>38,5366</b>                        | <b>124,0650</b>                          | <b>0,31</b>     |

$$^a K_r = \phi \cdot \tau^{-1}$$

$$^b K_{nr} = K_r \cdot (\phi^{-1} - 1)$$

## 4 Crystal structures

**Table S2.** Crystallographic data and structure refinement details for **1-OTf**, **1-NO<sub>3</sub>·0.5EtOH**, **1-NO<sub>3</sub>·H<sub>2</sub>O** and **1-I·0.5CH<sub>2</sub>Cl<sub>2</sub>**

|                                                                   | <b>1-OTf</b>                                                                      | <b>1-NO<sub>3</sub>·0.5EtOH</b>                                                                         | <b>1-NO<sub>3</sub>·H<sub>2</sub>O</b>                               | <b>1-I·0.5CH<sub>2</sub>Cl<sub>2</sub></b>                                              |
|-------------------------------------------------------------------|-----------------------------------------------------------------------------------|---------------------------------------------------------------------------------------------------------|----------------------------------------------------------------------|-----------------------------------------------------------------------------------------|
| Chemical Formula                                                  | C <sub>16</sub> H <sub>17</sub> N <sub>2</sub> , CF <sub>3</sub> O <sub>3</sub> S | C <sub>16</sub> H <sub>17</sub> N <sub>2</sub> , NO <sub>3</sub> , 0.5(C <sub>2</sub> H <sub>6</sub> O) | C <sub>16</sub> H <sub>17</sub> N <sub>2</sub> , NO <sub>3</sub> , O | 2(C <sub>16</sub> H <sub>17</sub> N <sub>2</sub> ), 2I, CH <sub>2</sub> Cl <sub>2</sub> |
| Molecular weight                                                  | 386.38                                                                            | 322.36                                                                                                  | 315.32                                                               | 813.36                                                                                  |
| T(K)                                                              | 293(2)                                                                            | 120(2)                                                                                                  | 293(2)                                                               | 120(2)                                                                                  |
| Crystal system                                                    | Triclinic                                                                         | Monoclinic                                                                                              | Triclinic                                                            | Monoclinic                                                                              |
| space group                                                       | <i>P</i> -1                                                                       | <i>C</i> 2/ <i>c</i>                                                                                    | <i>P</i> -1                                                          | <i>C</i> 2/ <i>c</i>                                                                    |
| a(Å)                                                              | 7.5128(5)                                                                         | 46.7400(18)                                                                                             | 7.456(2)                                                             | 17.3639(9)                                                                              |
| b(Å)                                                              | 8.6916(5)                                                                         | 7.5898(3)                                                                                               | 9.299(3)                                                             | 7.5370(4)                                                                               |
| c(Å)                                                              | 13.7154(8)                                                                        | 28.5740(11)                                                                                             | 12.571(3)                                                            | 26.8262(14)                                                                             |
| α(°)                                                              | 104.2767(9)                                                                       | 90                                                                                                      | 75.967(4)                                                            | 90                                                                                      |
| β(°)                                                              | 91.5096(9)                                                                        | 106.8120(10)                                                                                            | 77.518(4)                                                            | 105.8189(7)                                                                             |
| γ(°)                                                              | 91.7180(9)                                                                        | 90                                                                                                      | 70.952(4)                                                            | 90                                                                                      |
| V(Å <sup>3</sup> )                                                | 867.02(9)                                                                         | 9703.3(7)                                                                                               | 790.3(4)                                                             | 3377.8(3)                                                                               |
| Z                                                                 | 2                                                                                 | 24                                                                                                      | 2                                                                    | 4                                                                                       |
| D <sub>calcd</sub> (g cm <sup>-3</sup> )                          | 1.480                                                                             | 1.324                                                                                                   | 1.325                                                                | 1.599                                                                                   |
| μ (mm <sup>-1</sup> )                                             | 0.237                                                                             | 0.094                                                                                                   | 0.097                                                                | 2.048                                                                                   |
| Crystal size (mm)                                                 | 0.55 x 0.17 x 0.03                                                                | 0.32 x 0.33 x 0.22                                                                                      | 0.15 x 0.12 x 0.12                                                   | 0.42 x 0.27 x 0.12                                                                      |
| 2θ <sub>max</sub> , °                                             | 61.04                                                                             | 61.03                                                                                                   | 61.13                                                                | 61.02                                                                                   |
| No. of measured, independent and observed [I > 2σ(I)] reflections | 19531 / 5294 / 3976                                                               | 88189 / 14792 / 10977                                                                                   | 14379 / 4815 / 2538                                                  | 31951 / 5159 / 4935                                                                     |
| (R <sub>int</sub> )/(R <sub>σ</sub> )                             | 0.0202 / 0.0190                                                                   | 0.0341 / 0.0267                                                                                         | 0.0322 / 0.0404                                                      | 0.0140 / 0.0093                                                                         |
| data/restraints/params                                            | 5294 / 0 / 238                                                                    | 14792 / 78 / 690                                                                                        | 4811 / 0 / 211                                                       | 5159 / 0 / 201                                                                          |
| R[F <sup>2</sup> > 2σ(F <sup>2</sup> )], wR(F <sup>2</sup> )      | 0.0695, 0.1278                                                                    | 0.0503, 0.1503                                                                                          | 0.0723, 0.2593                                                       | 0.0187, 0.0482                                                                          |
| S                                                                 | 1.055                                                                             | 1.035                                                                                                   | 1.025                                                                | 1.067                                                                                   |
| Δρ <sub>max</sub> , Δρ <sub>min</sub> (e Å <sup>-3</sup> )        | 0.225, -0.355                                                                     | 0.417, -0.243                                                                                           | 0.293, -0.432                                                        | 0.913, -0.627                                                                           |

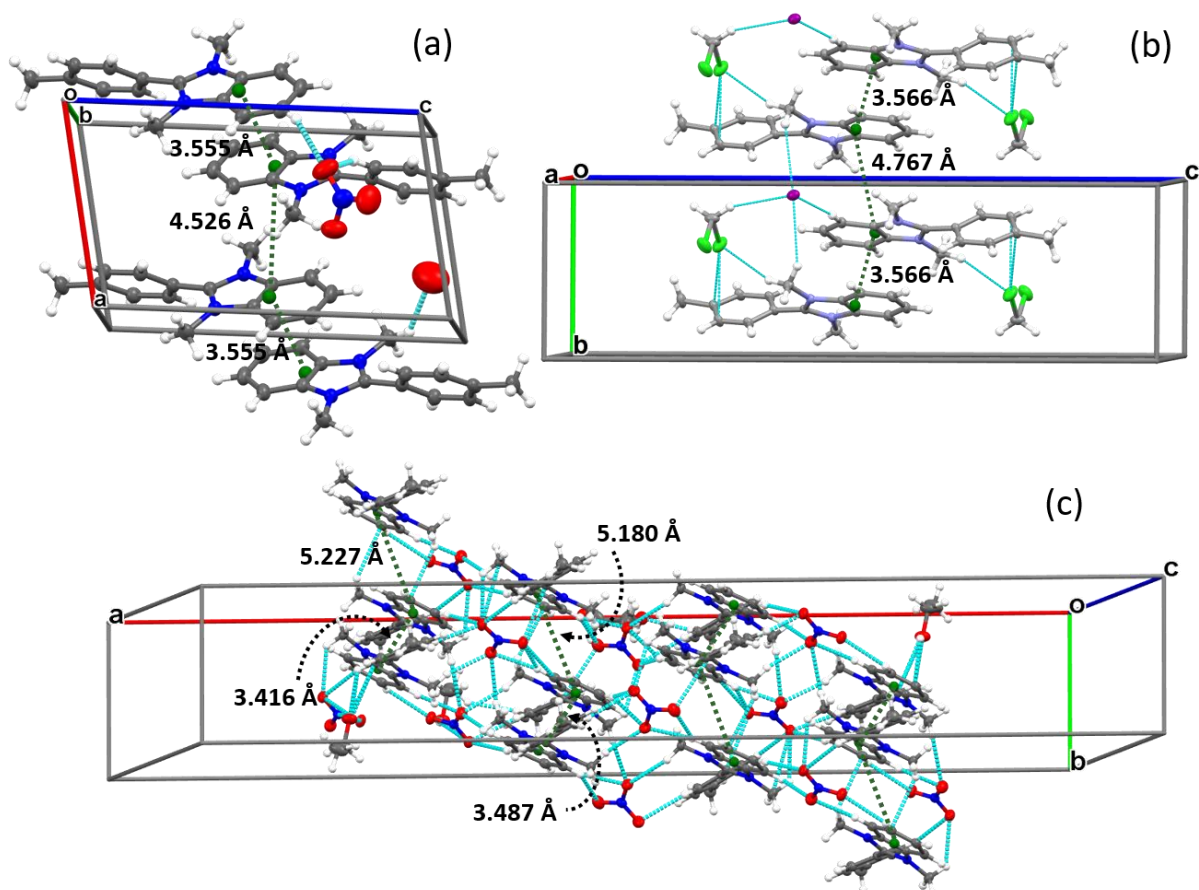

**Figure S12.** Fragments of crystal packing of (a)  $1\text{-NO}_3\cdot\text{H}_2\text{O}$ , (b)  $1\text{-I}\cdot 0.5\text{CH}_2\text{Cl}_2$  and (c)  $1\text{-NO}_3\cdot 0.5\text{EtOH}$  with contacts shorter than the sum of van der Waals radii (cyan dashed lines) and distances between benzimidazole centroids (green circles). Ellipsoids at 30% ( $1\text{-NO}_3\cdot\text{H}_2\text{O}$ ) and 50% ( $1\text{-I}\cdot 0.5\text{CH}_2\text{Cl}_2$  and  $1\text{-NO}_3\cdot 0.5\text{EtOH}$ ) probability.

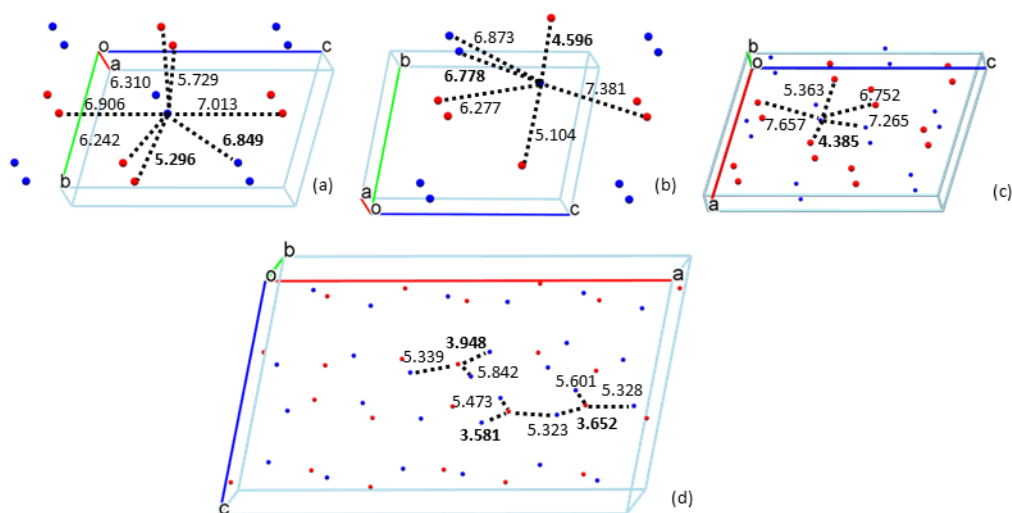

**Figure S13.** Shortest distances between cation and anion (blue and red circles, respectively) centroids in the crystal structures of (a)  $1\text{-OTf}$ , (b)  $1\text{-NO}_3\cdot\text{H}_2\text{O}$ , (c)  $1\text{-I}\cdot 0.5\text{CH}_2\text{Cl}_2$  and (d)  $1\text{-NO}_3\cdot 0.5\text{EtOH}$ .

## 5 Theoretical studies

Comparison between the optimized geometry of **1** in gas phase with the X-ray ones of the **1-OTf**, **1-NO<sub>3</sub>·0.5EtOH**, **1-NO<sub>3</sub>·H<sub>2</sub>O** and **1-I·0.5CH<sub>2</sub>Cl<sub>2</sub>** salts indicates that crystal packing does not perturb significantly the molecular conformation, which can be then supposed to be preserved also in solution. The optimized structure of **1** is in fact only slightly more twisted with respect to that found in the crystal structures, as indicated by the dihedral angle  $\theta$  between the l.s. planes through the benzimidazole moiety and the phenyl atoms. This angle measures in fact 59.92° in the optimized structure of **1** and 52.35° in the crystal structure of **1-OTf**, 48.23, 53.21 and 49.71° in the three independent molecules of **1-NO<sub>3</sub>·0.5EtOH**, 53.09° in **1-NO<sub>3</sub>·H<sub>2</sub>O** and 48.33° in **1-I·0.5CH<sub>2</sub>Cl<sub>2</sub>**. Moreover, the distance of the C9–C10 bond connecting the two aromatic moieties is comparable in all cases, varying from 1.462 to 1.469 Å, suggesting a similar conjugation degree in the isolated cation and in the salts.

The simulated absorption spectrum of **1** is reported in Figure S14 (see Table S3 for the first singlet and triplet excitation energies). The overall shape of the spectrum reproduces the experimental one in MeOH/EtOH (displaying three bands at 210, 240 and 280 nm), though the computed maxima (at 190, 220, 245 nm) are slightly shifted towards higher energies.

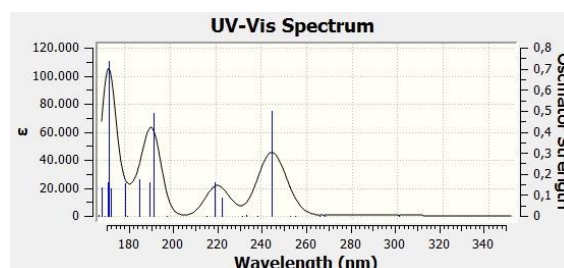

**Figure S14.**  $\omega$ B97X/6-311++G(d,p) computed absorption spectrum of **1**, resulting from convolution of the excitation energies (blue sticks) with 0.15 eV of half-bandwidth

The  $S_0 \rightarrow S_1$  excitation, computed at 245 nm with oscillator strength  $f=0.60$ , is mainly (75%) a HOMO  $\rightarrow$  LUMO transition where both HOMO and LUMO are  $\pi$  orbitals delocalized on the whole molecule (see Figure S15).

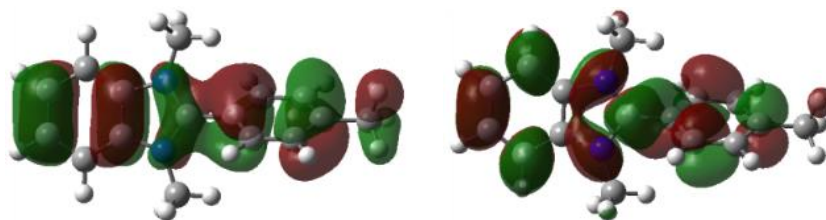

**Figure S15.** Plot of  $\omega$ B97X/6-311++G(d,p) HOMO (left) and LUMO (right) of the optimized geometry of **1** with an isosurface value of 0.02.

Analysis of the first singlet and triplet excitation energies (see Table S3) reveals the presence of a triplet state ( $T_7$ ) of  $(\pi, \pi^*)$  character just below  $S_1$  ( $\Delta E=0.162$  eV, 8 nm). Such small S-T energy gap could allow an otherwise forbidden ISC from the singlet to the close triplet state which decays to  $T_1$  by internal conversion, explaining the fluorescent (from  $S_1$ ) and phosphorescent (from  $T_1$ ) emission of solutions of **1**-salts, the latter observed only at low temperature, as usually happen for typical organic molecules. The  $(\pi, \pi^*)$  character of the emission from  $T_1$  to  $S_0$  explains its long lifetimes in solution.

Calculations of the excitation energies on the **1-OTf**, **1-NO<sub>3</sub>** and **1-I** ionic pairs to simulate any effect of the counterion on the emissive properties of **1** (see Table S4 for **1-OTf**) provide the first significantly populated (i.e. with  $f>0.1$ ) singlet excited state slightly shifted towards lower energies (248, 249 and 253 nm for **1-OTf**, **1-NO<sub>3</sub>** and **1-I**, respectively) with respect to **1**. Moreover, they display CT character from the anion towards **1** as exemplified in Figure S16 for **1-OTf**, where we plot the MOs mainly involved (66%) in the  $S_0 \rightarrow S_1$  transition.

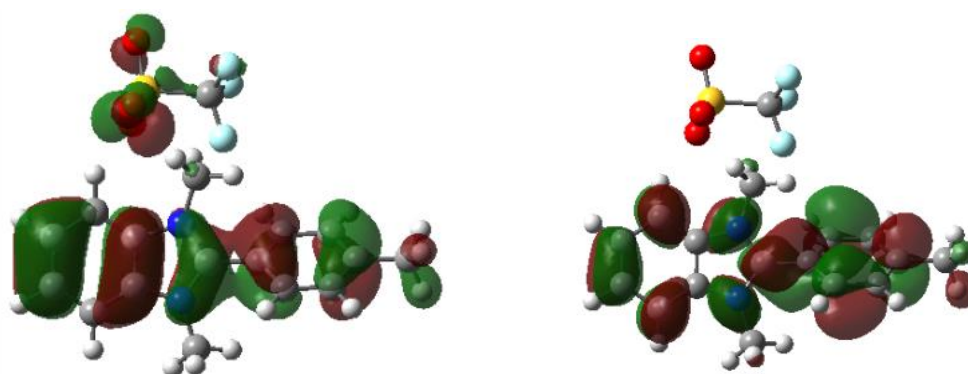

**Figure S16.** Plot of  $\omega$ B97X/6-311++G(d,p) occupied (left) and unoccupied (right) MOs mainly involved in the  $S_0 \rightarrow S_1$  transition of the **1-OTf** pair (isosurface value 0.02).

Optimization of  $S_1$  of **1** (see Figure S17 for the simulated spectrum of fluorescence) leads to a more planar conformation with respect to the ground state one (the dihedral angle  $\theta$  measures  $27.77^\circ$ ),



indicating a larger conjugation within the molecule. In fact, the C–C bond connecting the phenyl ring with benzimidazole shortens from 1.469 (ground state) to 1.402 Å (excited state). The fluorescence is computed at 312 nm with high oscillator strength ( $f=0.88$ ), in agreement with the high quantum yields measured in solution. The computed Stokes shift (about 70 nm) is comparable with the experimental one.

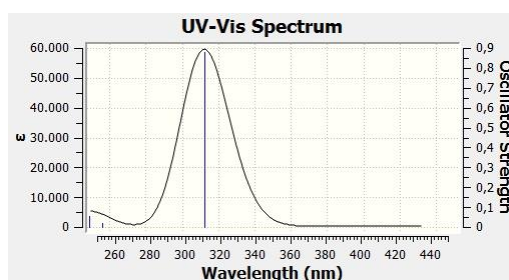

**Figure S17.**  $\omega$ B97X/6-311++G(d,p) fluorescence spectrum of **1**, resulting from convolution of the excitation energies (blue sticks) with 0.2 eV of half-bandwidth

**Table S3.** First TD- $\omega$ B97X/6-311++G(d,p)  $S_0 \rightarrow S_n$  and  $S_0 \rightarrow T_n$  transitions computed on the optimized structure of **1**.

Excitation energies and oscillator strengths:

|                  |          |           |           |           |        |                                  |
|------------------|----------|-----------|-----------|-----------|--------|----------------------------------|
| T1 Excited State | 1:       | Triplet-A | 3.4468 eV | 359.71 nm | $f=nd$ | $\langle S^{*2} \rangle = 2.000$ |
|                  | 60 -> 64 | 0.15339   |           |           |        |                                  |
|                  | 60 -> 66 | -0.25298  |           |           |        |                                  |
|                  | 61 -> 65 | -0.34304  |           |           |        |                                  |
|                  | 61 -> 68 | 0.10297   |           |           |        |                                  |
|                  | 63 -> 64 | 0.39109   |           |           |        |                                  |
|                  | 63 -> 66 | -0.27116  |           |           |        |                                  |
| T2 Excited State | 2:       | Triplet-A | 3.4953 eV | 354.72 nm | $f=nd$ | $\langle S^{*2} \rangle = 2.000$ |
|                  | 60 -> 68 | -0.19525  |           |           |        |                                  |
|                  | 62 -> 64 | 0.49892   |           |           |        |                                  |
|                  | 62 -> 66 | 0.30488   |           |           |        |                                  |
|                  | 62 -> 70 | -0.15923  |           |           |        |                                  |
|                  | 63 -> 68 | 0.19852   |           |           |        |                                  |
| T3 Excited State | 3:       | Triplet-A | 4.1221 eV | 300.78 nm | $f=nd$ | $\langle S^{*2} \rangle = 2.000$ |
|                  | 60 -> 64 | -0.41311  |           |           |        |                                  |
|                  | 60 -> 66 | -0.11005  |           |           |        |                                  |
|                  | 61 -> 65 | 0.15395   |           |           |        |                                  |
|                  | 63 -> 64 | 0.44410   |           |           |        |                                  |
|                  | 63 -> 66 | 0.23257   |           |           |        |                                  |
| T4 Excited State | 4:       | Triplet-A | 4.6260 eV | 268.02 nm | $f=nd$ | $\langle S^{*2} \rangle = 2.000$ |
|                  | 61 -> 64 | 0.49800   |           |           |        |                                  |
|                  | 61 -> 65 | 0.11791   |           |           |        |                                  |
|                  | 61 -> 66 | -0.42177  |           |           |        |                                  |
|                  | 63 -> 65 | -0.10443  |           |           |        |                                  |
| T5 Excited State | 5:       | Triplet-A | 4.6665 eV | 265.69 nm | $f=nd$ | $\langle S^{*2} \rangle = 2.000$ |
|                  | 60 -> 64 | 0.27244   |           |           |        |                                  |
|                  | 60 -> 66 | -0.10889  |           |           |        |                                  |
|                  | 61 -> 65 | 0.49220   |           |           |        |                                  |
|                  | 61 -> 66 | 0.13411   |           |           |        |                                  |
|                  | 61 -> 67 | -0.12576  |           |           |        |                                  |
|                  | 61 -> 68 | -0.13926  |           |           |        |                                  |
|                  | 63 -> 64 | 0.16111   |           |           |        |                                  |



|                   |          |           |           |           |          |              |  |
|-------------------|----------|-----------|-----------|-----------|----------|--------------|--|
|                   | 63 -> 66 | -0.24527  |           |           |          |              |  |
| T6 Excited State  | 6:       | Triplet-A | 4.8634 eV | 254.93 nm | f=nd     | <S**2>=2.000 |  |
|                   | 59 -> 64 | -0.12739  |           |           |          |              |  |
|                   | 60 -> 68 | -0.37481  |           |           |          |              |  |
|                   | 62 -> 64 | -0.31472  |           |           |          |              |  |
|                   | 63 -> 65 | 0.20280   |           |           |          |              |  |
|                   | 63 -> 68 | 0.38059   |           |           |          |              |  |
| T7 Excited State  | 7:       | Triplet-A | 4.9040 eV | 252.83 nm | f=nd     | <S**2>=2.000 |  |
|                   | 60 -> 65 | 0.39016   |           |           |          |              |  |
|                   | 60 -> 67 | -0.10349  |           |           |          |              |  |
|                   | 63 -> 65 | 0.46239   |           |           |          |              |  |
|                   | 63 -> 66 | 0.11803   |           |           |          |              |  |
|                   | 63 -> 67 | -0.10697  |           |           |          |              |  |
|                   | 63 -> 68 | -0.21121  |           |           |          |              |  |
| S1 Excited State  | 8:       | Singlet-A | 5.0626 eV | 244.90 nm | f=0.4991 | <S**2>=0.000 |  |
|                   | 60 -> 64 | -0.15113  |           |           |          |              |  |
|                   | 60 -> 66 | -0.18343  |           |           |          |              |  |
|                   | 62 -> 68 | -0.20813  |           |           |          |              |  |
|                   | 63 -> 64 | 0.60912   |           |           |          |              |  |
| T8 Excited State  | 9:       | Triplet-A | 5.1996 eV | 238.45 nm | f=nd     | <S**2>=2.000 |  |
|                   | 52 -> 64 | -0.10065  |           |           |          |              |  |
|                   | 56 -> 64 | 0.13488   |           |           |          |              |  |
|                   | 60 -> 66 | -0.15474  |           |           |          |              |  |
|                   | 60 -> 70 | 0.10211   |           |           |          |              |  |
|                   | 62 -> 65 | 0.15934   |           |           |          |              |  |
|                   | 62 -> 68 | 0.54527   |           |           |          |              |  |
|                   | 63 -> 70 | -0.15433  |           |           |          |              |  |
|                   | 63 -> 72 | -0.15996  |           |           |          |              |  |
| S2 Excited State  | 10:      | Singlet-A | 5.3058 eV | 233.68 nm | f=0.0056 | <S**2>=0.000 |  |
|                   | 60 -> 65 | 0.22786   |           |           |          |              |  |
|                   | 61 -> 64 | 0.41767   |           |           |          |              |  |
|                   | 61 -> 66 | -0.31319  |           |           |          |              |  |
|                   | 62 -> 64 | 0.11152   |           |           |          |              |  |
|                   | 63 -> 65 | 0.33352   |           |           |          |              |  |
| T9 Excited State  | 11:      | Triplet-A | 5.3487 eV | 231.80 nm | f=nd     | <S**2>=2.000 |  |
|                   | 59 -> 64 | 0.39323   |           |           |          |              |  |
|                   | 59 -> 72 | 0.12080   |           |           |          |              |  |
|                   | 60 -> 68 | -0.15316  |           |           |          |              |  |
|                   | 62 -> 64 | 0.14717   |           |           |          |              |  |
|                   | 62 -> 66 | -0.21286  |           |           |          |              |  |
|                   | 62 -> 70 | 0.28531   |           |           |          |              |  |
|                   | 62 -> 72 | 0.26152   |           |           |          |              |  |
|                   | 63 -> 68 | 0.16861   |           |           |          |              |  |
| S3 Excited State  | 12:      | Singlet-A | 5.5616 eV | 222.93 nm | f=0.0891 | <S**2>=0.000 |  |
|                   | 60 -> 68 | -0.14616  |           |           |          |              |  |
|                   | 61 -> 64 | -0.11434  |           |           |          |              |  |
|                   | 62 -> 64 | 0.60870   |           |           |          |              |  |
|                   | 62 -> 66 | 0.19538   |           |           |          |              |  |
|                   | 63 -> 68 | 0.18833   |           |           |          |              |  |
| S4 Excited State  | 13:      | Singlet-A | 5.6397 eV | 219.84 nm | f=0.1584 | <S**2>=0.000 |  |
|                   | 60 -> 64 | 0.45845   |           |           |          |              |  |
|                   | 61 -> 65 | -0.16526  |           |           |          |              |  |
|                   | 62 -> 68 | 0.26787   |           |           |          |              |  |
|                   | 63 -> 64 | 0.23038   |           |           |          |              |  |
|                   | 63 -> 66 | -0.29816  |           |           |          |              |  |
| T10 Excited State | 14:      | Triplet-A | 5.7372 eV | 216.10 nm | f=nd     | <S**2>=2.000 |  |
|                   | 56 -> 64 | -0.15832  |           |           |          |              |  |
|                   | 60 -> 66 | 0.25802   |           |           |          |              |  |
|                   | 60 -> 70 | -0.16405  |           |           |          |              |  |

|                       |           |           |           |          |              |  |
|-----------------------|-----------|-----------|-----------|----------|--------------|--|
| 60 -> 72              | -0.14077  |           |           |          |              |  |
| 62 -> 65              | 0.10545   |           |           |          |              |  |
| 62 -> 68              | 0.34632   |           |           |          |              |  |
| 63 -> 66              | -0.12914  |           |           |          |              |  |
| 63 -> 70              | 0.27116   |           |           |          |              |  |
| 63 -> 72              | 0.26967   |           |           |          |              |  |
|                       |           |           |           |          |              |  |
| T11 Excited State 15: | Triplet-A | 6.2422 eV | 198.62 nm | f=nd     | <S**2>=2.000 |  |
| 52 -> 64              | -0.10051  |           |           |          |              |  |
| 54 -> 64              | -0.11880  |           |           |          |              |  |
| 60 -> 64              | 0.38809   |           |           |          |              |  |
| 60 -> 66              | 0.13123   |           |           |          |              |  |
| 60 -> 70              | 0.18612   |           |           |          |              |  |
| 60 -> 72              | 0.22924   |           |           |          |              |  |
| 63 -> 64              | 0.21992   |           |           |          |              |  |
| 63 -> 66              | 0.30751   |           |           |          |              |  |
| 63 -> 72              | 0.12214   |           |           |          |              |  |
|                       |           |           |           |          |              |  |
| S5 Excited State 16:  | Singlet-A | 6.4326 eV | 192.74 nm | f=0.4893 | <S**2>=0.000 |  |
| 60 -> 66              | 0.21409   |           |           |          |              |  |
| 61 -> 65              | 0.40050   |           |           |          |              |  |
| 61 -> 66              | 0.10021   |           |           |          |              |  |
| 61 -> 68              | -0.13969  |           |           |          |              |  |
| 62 -> 65              | 0.14969   |           |           |          |              |  |
| 62 -> 68              | 0.25670   |           |           |          |              |  |
| 63 -> 64              | 0.16511   |           |           |          |              |  |
| 63 -> 66              | 0.13415   |           |           |          |              |  |
| 63 -> 70              | 0.19251   |           |           |          |              |  |
| 63 -> 72              | 0.20386   |           |           |          |              |  |
|                       |           |           |           |          |              |  |
| S6 Excited State 17:  | Singlet-A | 6.4929 eV | 190.95 nm | f=0.1580 | <S**2>=0.000 |  |
| 60 -> 65              | -0.22664  |           |           |          |              |  |
| 61 -> 64              | 0.49325   |           |           |          |              |  |
| 61 -> 72              | 0.10685   |           |           |          |              |  |
| 63 -> 65              | -0.37331  |           |           |          |              |  |

**Table S4** First TD- $\omega$ B97X/6-311++G(d,p)  $S_0 \rightarrow S_n$  and  $S_0 \rightarrow T_n$  transitions computed on 1-OTf.

Excitation energies and oscillator strengths:

|                  |           |           |           |          |              |  |
|------------------|-----------|-----------|-----------|----------|--------------|--|
| Excited State 1: | Triplet-A | 3.3598 eV | 369.03 nm | f=0.0000 | <S**2>=2.000 |  |
| 91 ->101         | 0.18923   |           |           |          |              |  |
| 91 ->103         | -0.11590  |           |           |          |              |  |
| 91 ->104         | 0.21650   |           |           |          |              |  |
| 92 ->101         | -0.10335  |           |           |          |              |  |
| 92 ->102         | 0.25056   |           |           |          |              |  |
| 92 ->103         | -0.14444  |           |           |          |              |  |
| 95 ->101         | 0.20504   |           |           |          |              |  |
| 95 ->104         | -0.13334  |           |           |          |              |  |
| 96 ->101         | 0.34206   |           |           |          |              |  |
| 96 ->104         | 0.10388   |           |           |          |              |  |
| 97 ->101         | -0.23870  |           |           |          |              |  |
|                  |           |           |           |          |              |  |
| Excited State 2: | Triplet-A | 3.4663 eV | 357.68 nm | f=0.0000 | <S**2>=2.000 |  |
| 91 ->101         | -0.16279  |           |           |          |              |  |
| 92 ->102         | -0.15525  |           |           |          |              |  |
| 95 ->101         | 0.37136   |           |           |          |              |  |
| 95 ->104         | -0.29652  |           |           |          |              |  |
| 96 ->101         | -0.18054  |           |           |          |              |  |
| 96 ->107         | -0.12768  |           |           |          |              |  |
| 96 ->109         | 0.14614   |           |           |          |              |  |
| 97 ->104         | 0.14081   |           |           |          |              |  |
|                  |           |           |           |          |              |  |
| Excited State 3: | Triplet-A | 4.1181 eV | 301.07 nm | f=0.0000 | <S**2>=2.000 |  |
| 91 ->101         | -0.25963  |           |           |          |              |  |
| 92 ->101         | 0.13106   |           |           |          |              |  |

|               |     |           |           |           |          |              |  |
|---------------|-----|-----------|-----------|-----------|----------|--------------|--|
| 92 ->102      |     | -0.16702  |           |           |          |              |  |
| 92 ->103      |     | 0.12427   |           |           |          |              |  |
| 96 ->101      |     | 0.43211   |           |           |          |              |  |
| 96 ->104      |     | -0.27971  |           |           |          |              |  |
| 97 ->101      |     | -0.15112  |           |           |          |              |  |
| Excited State | 4:  | Triplet-A | 4.6335 eV | 267.58 nm | f=0.0000 | <S**2>=2.000 |  |
| 91 ->101      |     | 0.24954   |           |           |          |              |  |
| 91 ->104      |     | 0.13938   |           |           |          |              |  |
| 92 ->101      |     | 0.50215   |           |           |          |              |  |
| 92 ->102      |     | -0.10276  |           |           |          |              |  |
| 92 ->104      |     | 0.28730   |           |           |          |              |  |
| 96 ->102      |     | 0.10285   |           |           |          |              |  |
| Excited State | 5:  | Triplet-A | 4.6867 eV | 264.55 nm | f=0.0000 | <S**2>=2.000 |  |
| 91 ->101      |     | -0.28886  |           |           |          |              |  |
| 91 ->102      |     | 0.17968   |           |           |          |              |  |
| 92 ->101      |     | 0.16817   |           |           |          |              |  |
| 92 ->102      |     | 0.39104   |           |           |          |              |  |
| 92 ->103      |     | -0.28926  |           |           |          |              |  |
| 96 ->104      |     | -0.20212  |           |           |          |              |  |
| Excited State | 6:  | Triplet-A | 4.8200 eV | 257.23 nm | f=0.0000 | <S**2>=2.000 |  |
| 90 ->101      |     | -0.20242  |           |           |          |              |  |
| 91 ->107      |     | 0.13125   |           |           |          |              |  |
| 91 ->109      |     | -0.15502  |           |           |          |              |  |
| 95 ->101      |     | -0.28257  |           |           |          |              |  |
| 96 ->107      |     | -0.28882  |           |           |          |              |  |
| 96 ->109      |     | 0.31760   |           |           |          |              |  |
| 97 ->101      |     | 0.15729   |           |           |          |              |  |
| 97 ->109      |     | -0.10634  |           |           |          |              |  |
| Excited State | 7:  | Triplet-A | 4.9264 eV | 251.67 nm | f=0.0000 | <S**2>=2.000 |  |
| 91 ->102      |     | 0.38391   |           |           |          |              |  |
| 91 ->103      |     | -0.25085  |           |           |          |              |  |
| 92 ->101      |     | -0.15871  |           |           |          |              |  |
| 92 ->102      |     | -0.12954  |           |           |          |              |  |
| 92 ->103      |     | 0.11624   |           |           |          |              |  |
| 96 ->102      |     | 0.33145   |           |           |          |              |  |
| 96 ->103      |     | -0.21979  |           |           |          |              |  |
| 97 ->102      |     | -0.15172  |           |           |          |              |  |
| Excited State | 8:  | Singlet-A | 4.9947 eV | 248.23 nm | f=0.5335 | <S**2>=0.000 |  |
| 91 ->104      |     | 0.13640   |           |           |          |              |  |
| 95 ->107      |     | 0.12286   |           |           |          |              |  |
| 95 ->109      |     | -0.13674  |           |           |          |              |  |
| 96 ->101      |     | 0.57351   |           |           |          |              |  |
| 96 ->104      |     | -0.13447  |           |           |          |              |  |
| 97 ->101      |     | -0.24825  |           |           |          |              |  |
| Excited State | 9:  | Triplet-A | 5.1455 eV | 240.96 nm | f=0.0000 | <S**2>=2.000 |  |
| 90 ->101      |     | 0.14673   |           |           |          |              |  |
| 91 ->104      |     | -0.12585  |           |           |          |              |  |
| 95 ->104      |     | 0.11175   |           |           |          |              |  |
| 95 ->107      |     | 0.28948   |           |           |          |              |  |
| 95 ->109      |     | -0.37317  |           |           |          |              |  |
| 96 ->107      |     | -0.14834  |           |           |          |              |  |
| 96 ->112      |     | -0.10977  |           |           |          |              |  |
| 97 ->109      |     | 0.12138   |           |           |          |              |  |
| Excited State | 10: | Triplet-A | 5.2224 eV | 237.41 nm | f=0.0000 | <S**2>=2.000 |  |
| 90 ->101      |     | -0.28695  |           |           |          |              |  |
| 91 ->107      |     | -0.10702  |           |           |          |              |  |
| 91 ->109      |     | 0.12231   |           |           |          |              |  |
| 95 ->104      |     | -0.16262  |           |           |          |              |  |
| 95 ->107      |     | 0.22798   |           |           |          |              |  |
| 95 ->109      |     | -0.13795  |           |           |          |              |  |
| 95 ->112      |     | 0.15429   |           |           |          |              |  |

|                   |           |           |           |          |              |  |
|-------------------|-----------|-----------|-----------|----------|--------------|--|
| 95 ->115          | 0.12239   |           |           |          |              |  |
| 96 ->107          | 0.16035   |           |           |          |              |  |
| 96 ->109          | -0.20407  |           |           |          |              |  |
| 97 ->107          | -0.14795  |           |           |          |              |  |
| 97 ->109          | 0.12313   |           |           |          |              |  |
| Excited State 11: | Singlet-A | 5.2872 eV | 234.50 nm | f=0.0116 | <S**2>=0.000 |  |
| 91 ->101          | 0.18917   |           |           |          |              |  |
| 91 ->102          | -0.24992  |           |           |          |              |  |
| 91 ->103          | 0.13838   |           |           |          |              |  |
| 92 ->101          | 0.40203   |           |           |          |              |  |
| 92 ->103          | -0.11941  |           |           |          |              |  |
| 92 ->104          | 0.21532   |           |           |          |              |  |
| 95 ->101          | 0.14426   |           |           |          |              |  |
| 96 ->102          | -0.24085  |           |           |          |              |  |
| 96 ->103          | 0.14760   |           |           |          |              |  |
| 97 ->102          | 0.10747   |           |           |          |              |  |
| Excited State 12: | Singlet-A | 5.3336 eV | 232.46 nm | f=0.0416 | <S**2>=0.000 |  |
| 92 ->101          | 0.12175   |           |           |          |              |  |
| 95 ->101          | -0.27256  |           |           |          |              |  |
| 95 ->104          | 0.11105   |           |           |          |              |  |
| 97 ->101          | 0.13443   |           |           |          |              |  |
| 100 ->101         | 0.56197   |           |           |          |              |  |
| 100 ->104         | -0.10044  |           |           |          |              |  |
| Excited State 13: | Triplet-A | 5.3626 eV | 231.20 nm | f=0.0000 | <S**2>=2.000 |  |
| 100 ->101         | 0.68068   |           |           |          |              |  |
| 100 ->104         | -0.11702  |           |           |          |              |  |
| Excited State 14: | Singlet-A | 5.4302 eV | 228.32 nm | f=0.0797 | <S**2>=0.000 |  |
| 95 ->101          | 0.42179   |           |           |          |              |  |
| 95 ->104          | -0.16085  |           |           |          |              |  |
| 96 ->107          | -0.10879  |           |           |          |              |  |
| 97 ->101          | -0.25257  |           |           |          |              |  |
| 100 ->101         | 0.37729   |           |           |          |              |  |
| Excited State 15: | Triplet-A | 5.7032 eV | 217.39 nm | f=0.0000 | <S**2>=2.000 |  |
| 85 ->101          | 0.11636   |           |           |          |              |  |
| 89 ->101          | -0.10825  |           |           |          |              |  |
| 91 ->104          | -0.18058  |           |           |          |              |  |
| 95 ->107          | -0.19252  |           |           |          |              |  |
| 95 ->109          | 0.23531   |           |           |          |              |  |
| 96 ->104          | 0.20251   |           |           |          |              |  |
| 96 ->110          | 0.12956   |           |           |          |              |  |
| 96 ->111          | 0.11517   |           |           |          |              |  |
| 96 ->112          | -0.23044  |           |           |          |              |  |
| 96 ->113          | -0.10914  |           |           |          |              |  |
| 96 ->115          | -0.19685  |           |           |          |              |  |
| 97 ->107          | 0.10210   |           |           |          |              |  |
| Excited State 16: | Singlet-A | 5.7124 eV | 217.04 nm | f=0.1683 | <S**2>=0.000 |  |
| 91 ->101          | 0.40411   |           |           |          |              |  |
| 92 ->101          | -0.18264  |           |           |          |              |  |
| 92 ->102          | 0.14325   |           |           |          |              |  |
| 95 ->101          | -0.13069  |           |           |          |              |  |
| 95 ->107          | -0.19139  |           |           |          |              |  |
| 95 ->109          | 0.19657   |           |           |          |              |  |
| 96 ->101          | 0.15443   |           |           |          |              |  |
| 96 ->104          | 0.26338   |           |           |          |              |  |
| 97 ->104          | -0.12323  |           |           |          |              |  |
| Excited State 17: | Singlet-A | 6.3707 eV | 194.62 nm | f=0.0194 | <S**2>=0.000 |  |
| 90 ->101          | -0.12010  |           |           |          |              |  |
| 94 ->101          | 0.10390   |           |           |          |              |  |
| 95 ->101          | 0.22555   |           |           |          |              |  |
| 95 ->104          | -0.12553  |           |           |          |              |  |
| 96 ->101          | 0.23960   |           |           |          |              |  |

|               |          |           |           |           |          |              |
|---------------|----------|-----------|-----------|-----------|----------|--------------|
|               | 97 ->101 | 0.49976   |           |           |          |              |
|               | 99 ->101 | -0.20762  |           |           |          |              |
| Excited State | 18:      | Triplet-A | 6.4082 eV | 193.48 nm | f=0.0000 | <S**2>=2.000 |
|               | 94 ->101 | 0.10482   |           |           |          |              |
|               | 95 ->101 | 0.26622   |           |           |          |              |
|               | 96 ->101 | 0.19064   |           |           |          |              |
|               | 97 ->101 | 0.49743   |           |           |          |              |
|               | 97 ->104 | -0.14031  |           |           |          |              |
|               | 99 ->101 | -0.26866  |           |           |          |              |
| Excited State | 19:      | Singlet-A | 6.4092 eV | 193.45 nm | f=0.5239 | <S**2>=0.000 |
|               | 91 ->101 | 0.20984   |           |           |          |              |
|               | 91 ->104 | 0.14154   |           |           |          |              |
|               | 92 ->101 | -0.15968  |           |           |          |              |
|               | 92 ->102 | 0.32037   |           |           |          |              |
|               | 92 ->103 | -0.17073  |           |           |          |              |
|               | 95 ->107 | 0.21107   |           |           |          |              |
|               | 95 ->109 | -0.22290  |           |           |          |              |
|               | 96 ->101 | -0.15398  |           |           |          |              |
|               | 96 ->112 | 0.13113   |           |           |          |              |
|               | 96 ->115 | 0.11423   |           |           |          |              |
|               | 97 ->101 | 0.11547   |           |           |          |              |
| Excited State | 20:      | Singlet-A | 6.5707 eV | 188.69 nm | f=0.1430 | <S**2>=0.000 |
|               | 91 ->101 | 0.18572   |           |           |          |              |
|               | 91 ->102 | 0.19210   |           |           |          |              |
|               | 91 ->103 | -0.14440  |           |           |          |              |
|               | 92 ->101 | 0.31872   |           |           |          |              |
|               | 96 ->102 | 0.26413   |           |           |          |              |
|               | 96 ->103 | -0.12187  |           |           |          |              |
|               | 97 ->102 | -0.14547  |           |           |          |              |
|               | 99 ->101 | 0.39506   |           |           |          |              |

## 6 References

- S1 Riera-Galindo, S.; Orbelli Biroli, A.; Forni, A.; Puttisong, Y.; Tessore, F.; Pizzotti, M.; Pavlopoulou, E.; Solano, E.; Wang, S.; Wang, G.; et al. Impact of Singly Occupied Molecular Orbital Energy on the N-Doping Efficiency of Benzimidazole Derivatives. *ACS Appl. Mater. Interfaces* **2019**, *11* (41), 37981–37990.
- S2 G. M. Sheldrick, *Acta Crystallogr. C Struct. Chem.* 2015, **71**, 3.
- S3 J.-D. Chai and M. Head-Gordon, *J. Chem. Phys.*, 2008, **128**, 084106.
- S4 Gaussian 16, Revision A.03, M. J. Frisch, G. W. Trucks, H. B. Schlegel, G. E. Scuseria, M. A. Robb, J. R. Cheeseman, G. Scalmani, V. Barone, G. A. Petersson, H. Nakatsuji, X. Li, M. Caricato, A. V. Marenich, J. Bloino, B. G. Janesko, R. Gomperts, B. Mennucci, H. P. Hratchian, J. V. Ortiz, A. F. Izmaylov, J. L. Sonnenberg, D. Williams-Young, F. Ding, F. Lipparini, F. Egidi, J. Goings, B. Peng, A. Petrone, T. Henderson, D. Ranasinghe, V. G. Zakrzewski, J. Gao, N. Rega, G. Zheng, W. Liang, M. Hada, M. Ehara, K. Toyota, R. Fukuda, J. Hasegawa, M. Ishida, T. Nakajima, Y. Honda, O. Kitao, H. Nakai, T. Vreven, K. Throssell, J. A. Montgomery, Jr., J. E. Peralta, F. Ogliaro, M. J. Bearpark, J. J. Heyd, E. N. Brothers, K. N. Kudin, V. N. Staroverov, T. A. Keith, R. Kobayashi, J. Normand, K. Raghavachari, A. P. Rendell, J. C. Burant, S. S. Iyengar, J. Tomasi, M. Cossi, J. M. Millam, M. Klene, C. Adamo, R. Cammi, J. W. Ochterski, R. L. Martin, K. Morokuma, O. Farkas, J. B. Foresman and D. J. Fox, Gaussian, Inc., Wallingford CT, 2016.
